# Supplementary material for: Optimising Fluvoxamine Maternal/Fetal Exposure during Gestation: A Pharmacokinetic Virtual Clinical Trials Study
Source: MDPI journal article supplement (doi:10.3390/metabo12121281), 2022-12-16
Supplement: s1 [file s1]

# Optimising Fluvoxamine Maternal/Fetal Exposure during Gestation: A Pharmacokinetic Virtual Clinical Trials Study

Khairulanwar Burhanuddin and Raj Badhan \*

School of Pharmacy, College of Health and Life Science, Aston University, Birmingham B4 7ET, UK.

\* Correspondence: r.k.s.badhan@aston.ac.uk

## Supplementary materials

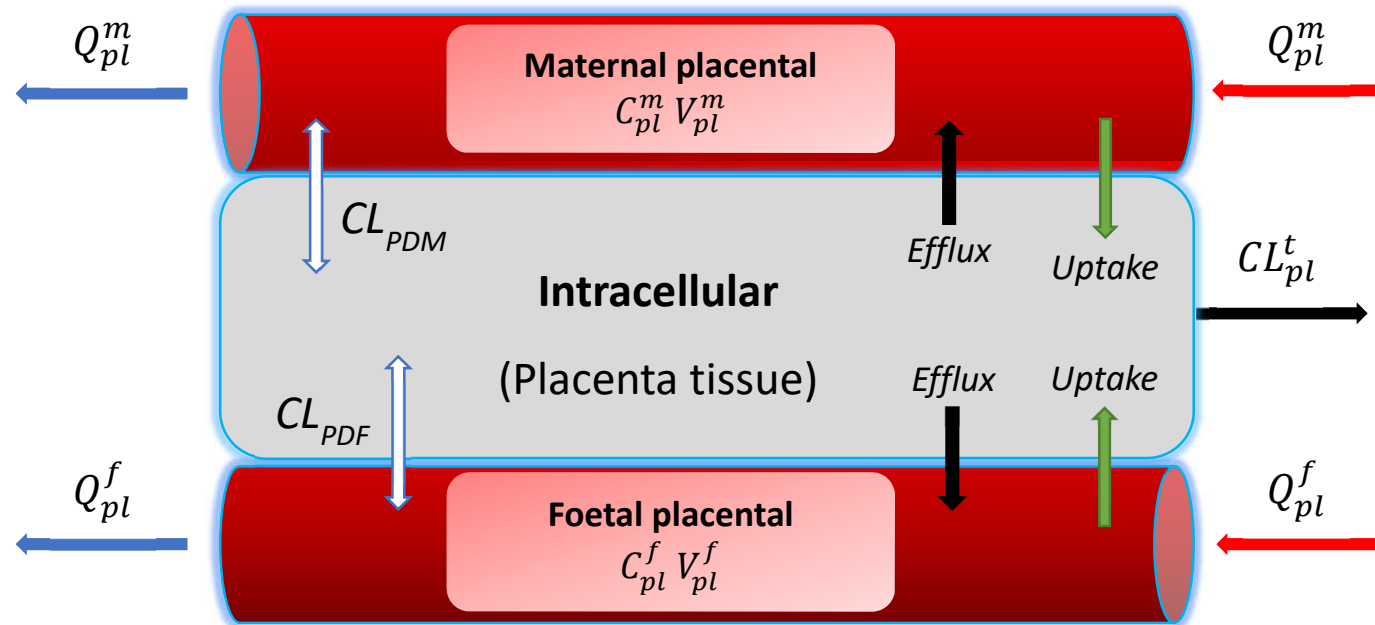

**Figure S1.** Fetoplacental compartment permeability-limited model.

$CL_{PDM}$ , maternal–placental permeability clearance;  $CL_{PDF}$ , placental–foetal permeability clearance;  $CL_{pl}^t$ , tissue–placenta permeability clearance;  $Q_{pl}^m$ , maternal blood flow rate;  $Q_{pl}^f$ , foetal blood flow rate;  $C_{pl}^m$ , maternal–placental concentration;  $C_{pl}^f$ , foetal–placental concentration;  $V_{pl}^m$ , maternal–placental volume;  $V_{pl}^f$ , foetal–placental volume.

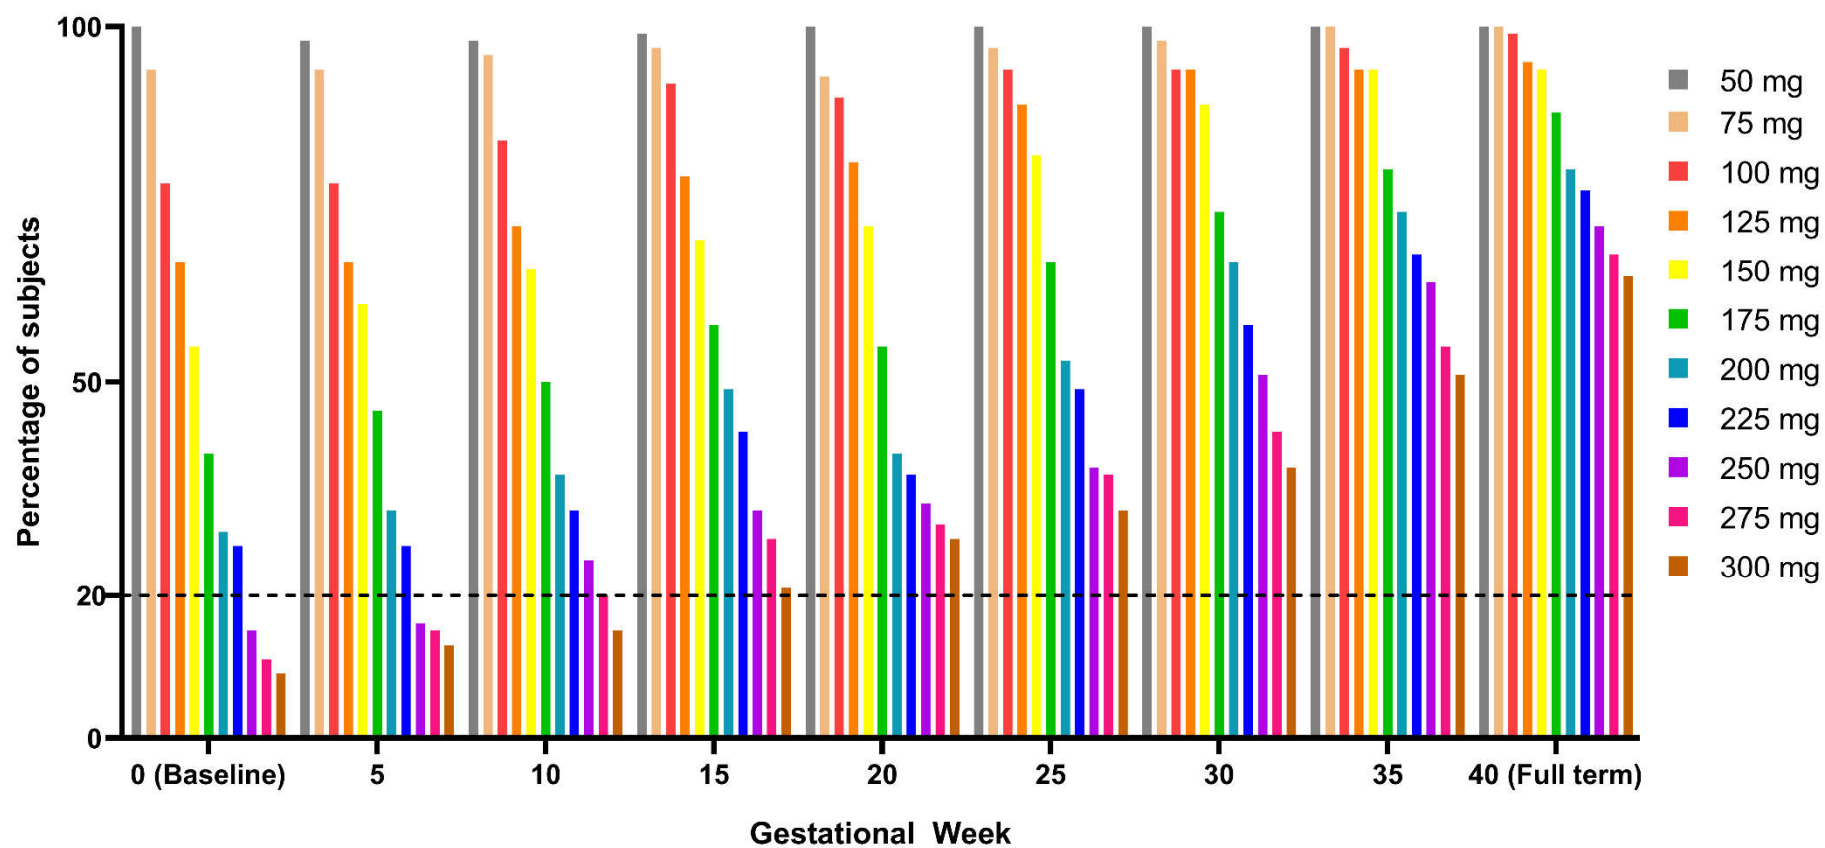

**Figure S2.** Percentage of Ultrarapid Metaboliser (UM) population with trough concentration below 60 ng/mL. The dashed horizontal line represents the threshold of 20% of subjects.

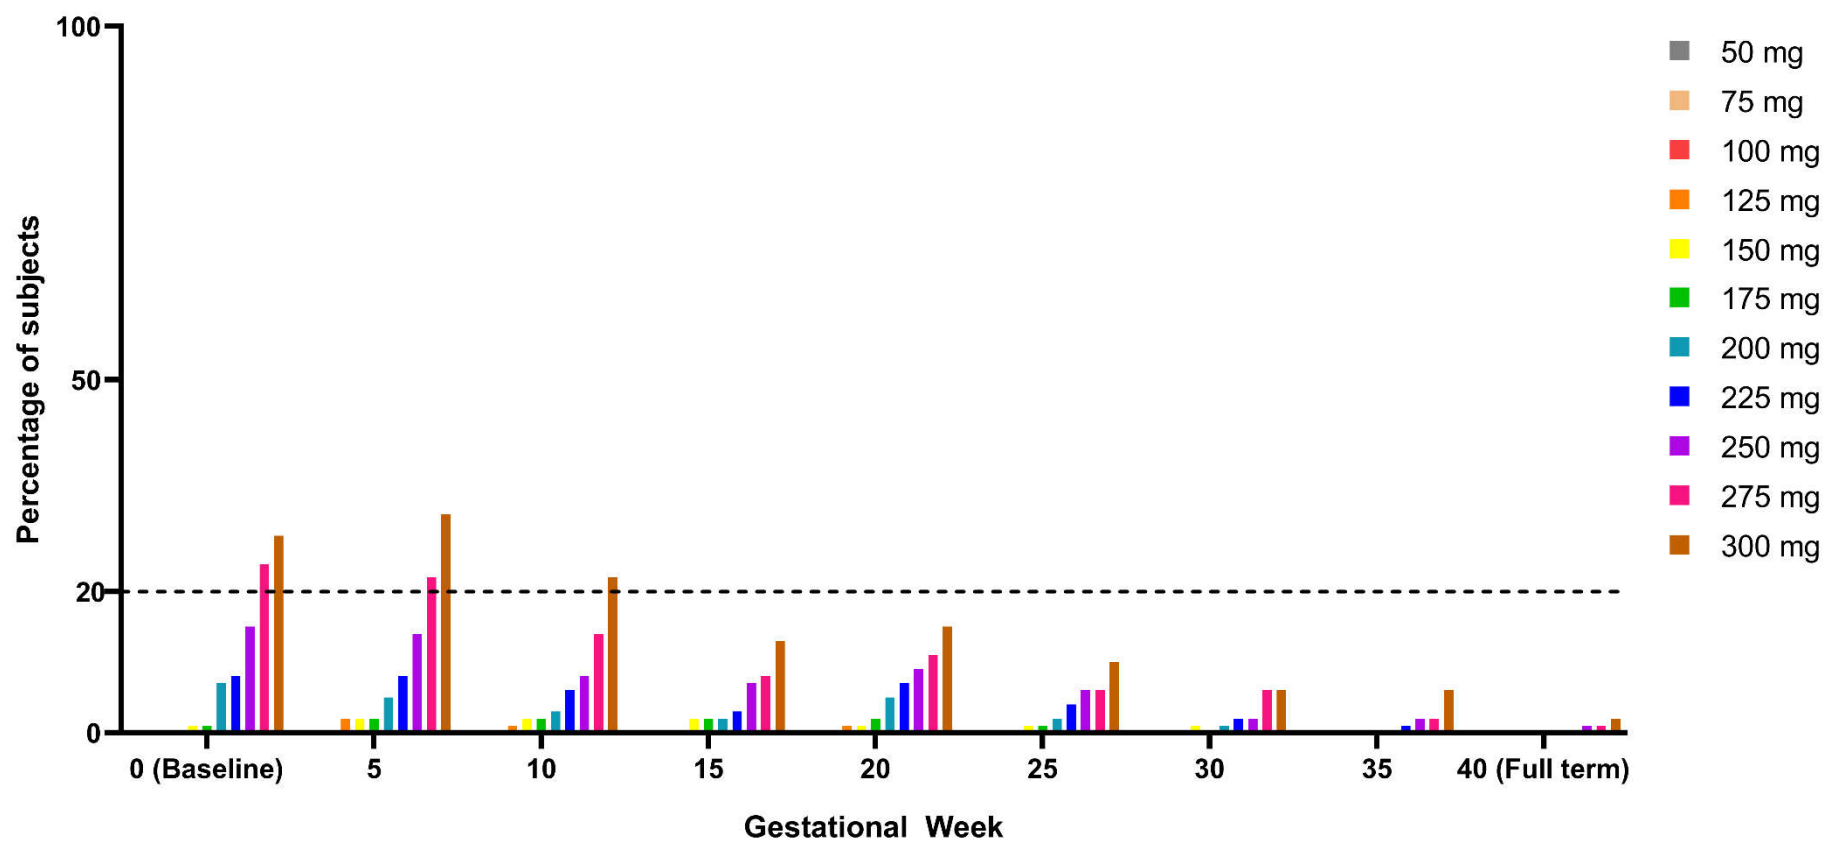

**Figure S3.** Percentage of UM population with peak concentration above 230 ng/mL. The dashed horizontal line represents the threshold of 20% of subjects.

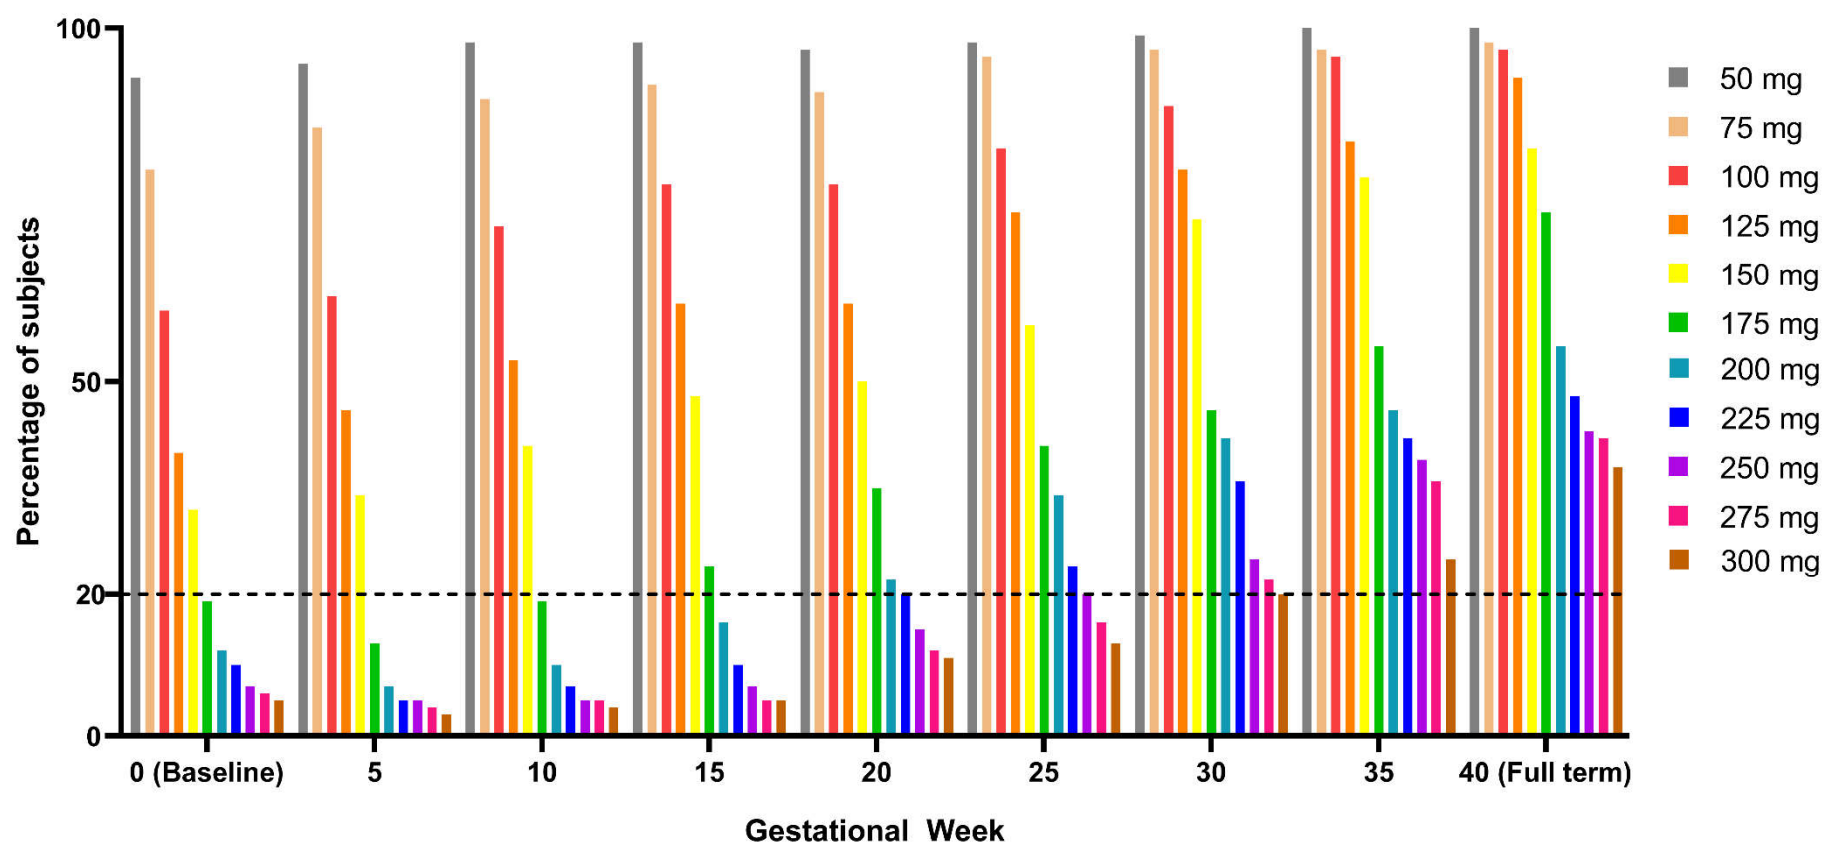

**Figure S4.** Percentage of Extensive Metaboliser (EM) population with trough concentration below 60 ng/mL. The dashed horizontal line represents the threshold of 20% of subjects.

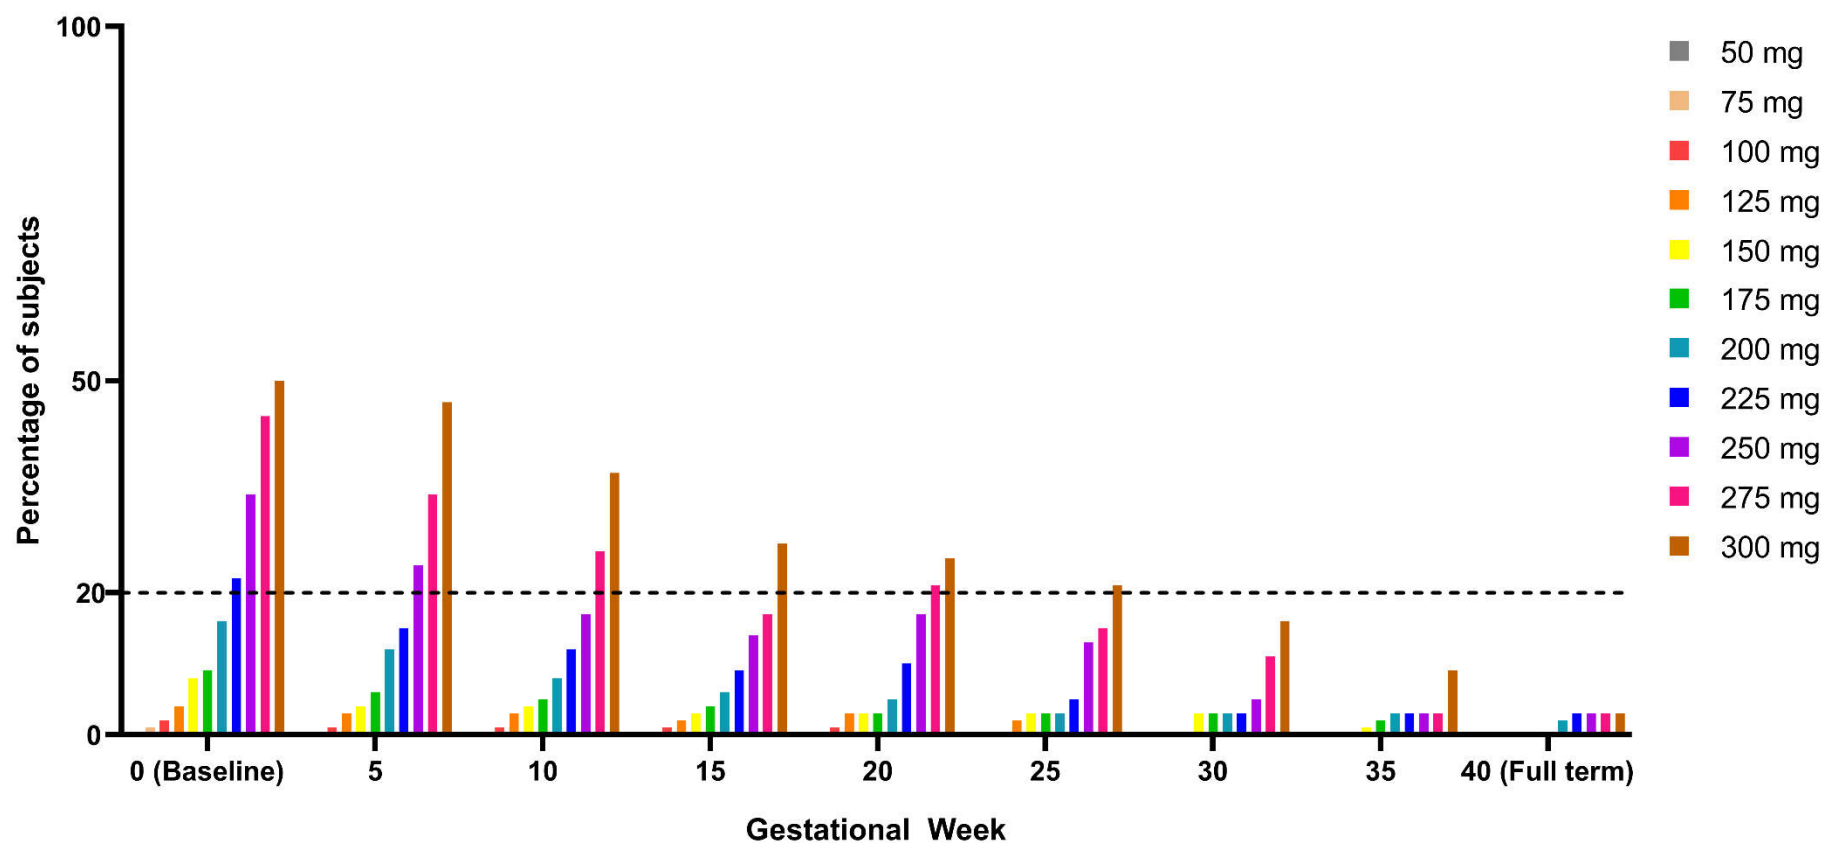

**Figure S5.** Percentage of EM population with peak concentration above 230 ng/mL. The dashed horizontal line represents the threshold of 20% of subjects.

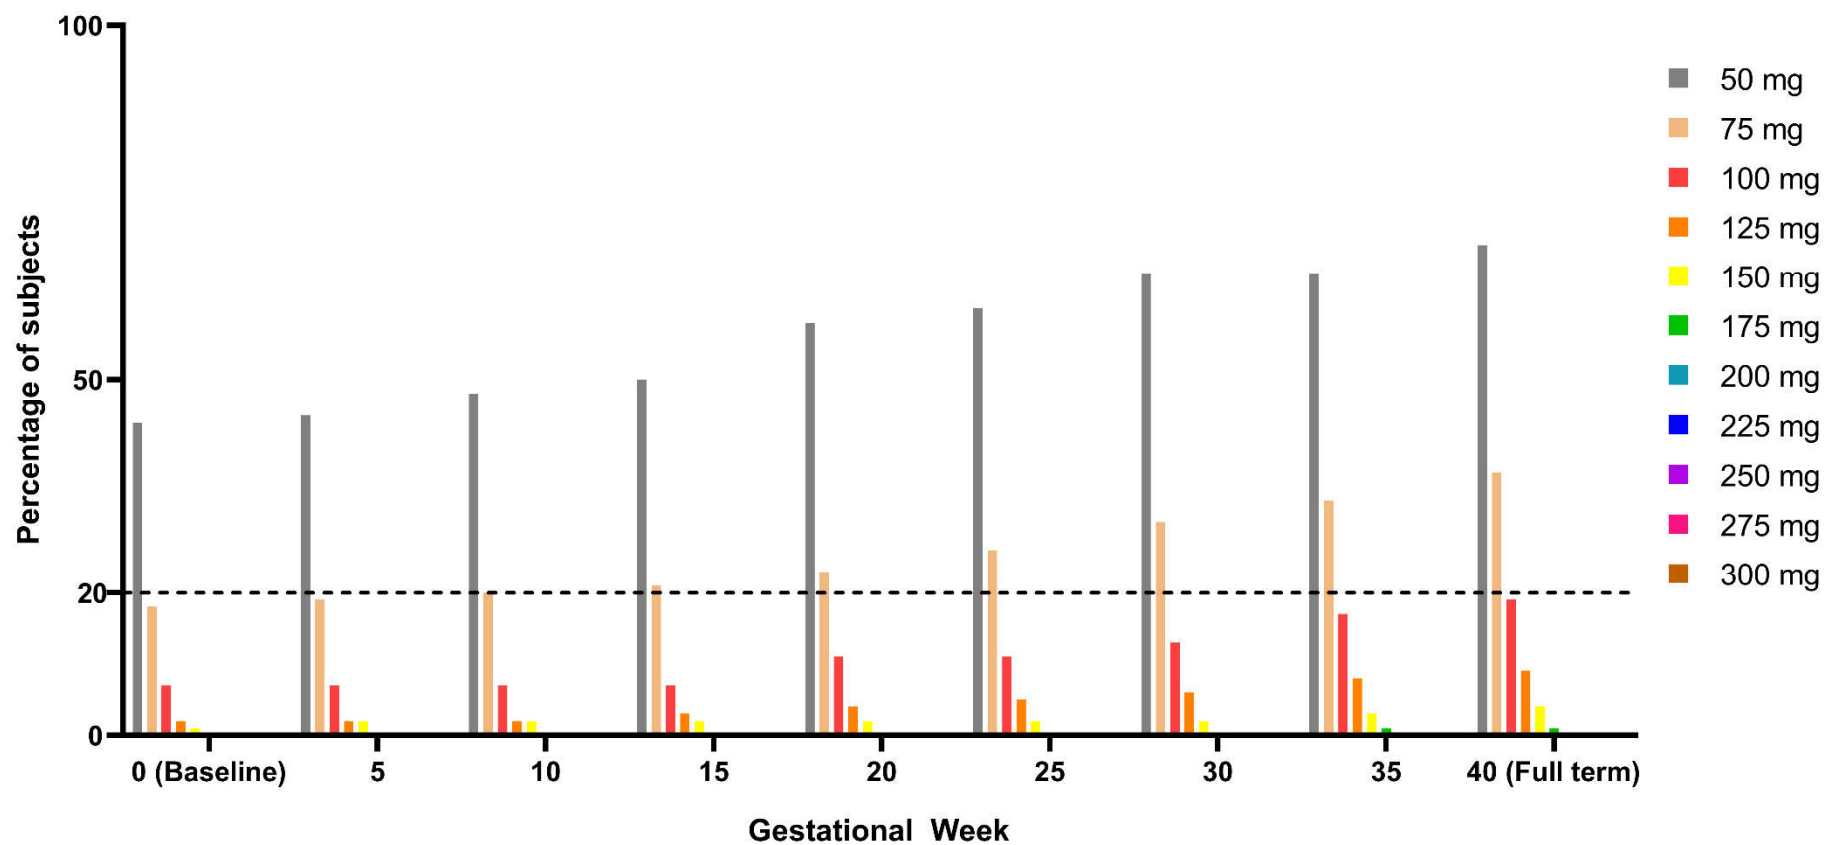

**Figure S6.** Percentage of Poor Metaboliser (PM) population with trough concentration below 60 ng/mL. The dashed horizontal line represents the threshold of 20% of subjects.

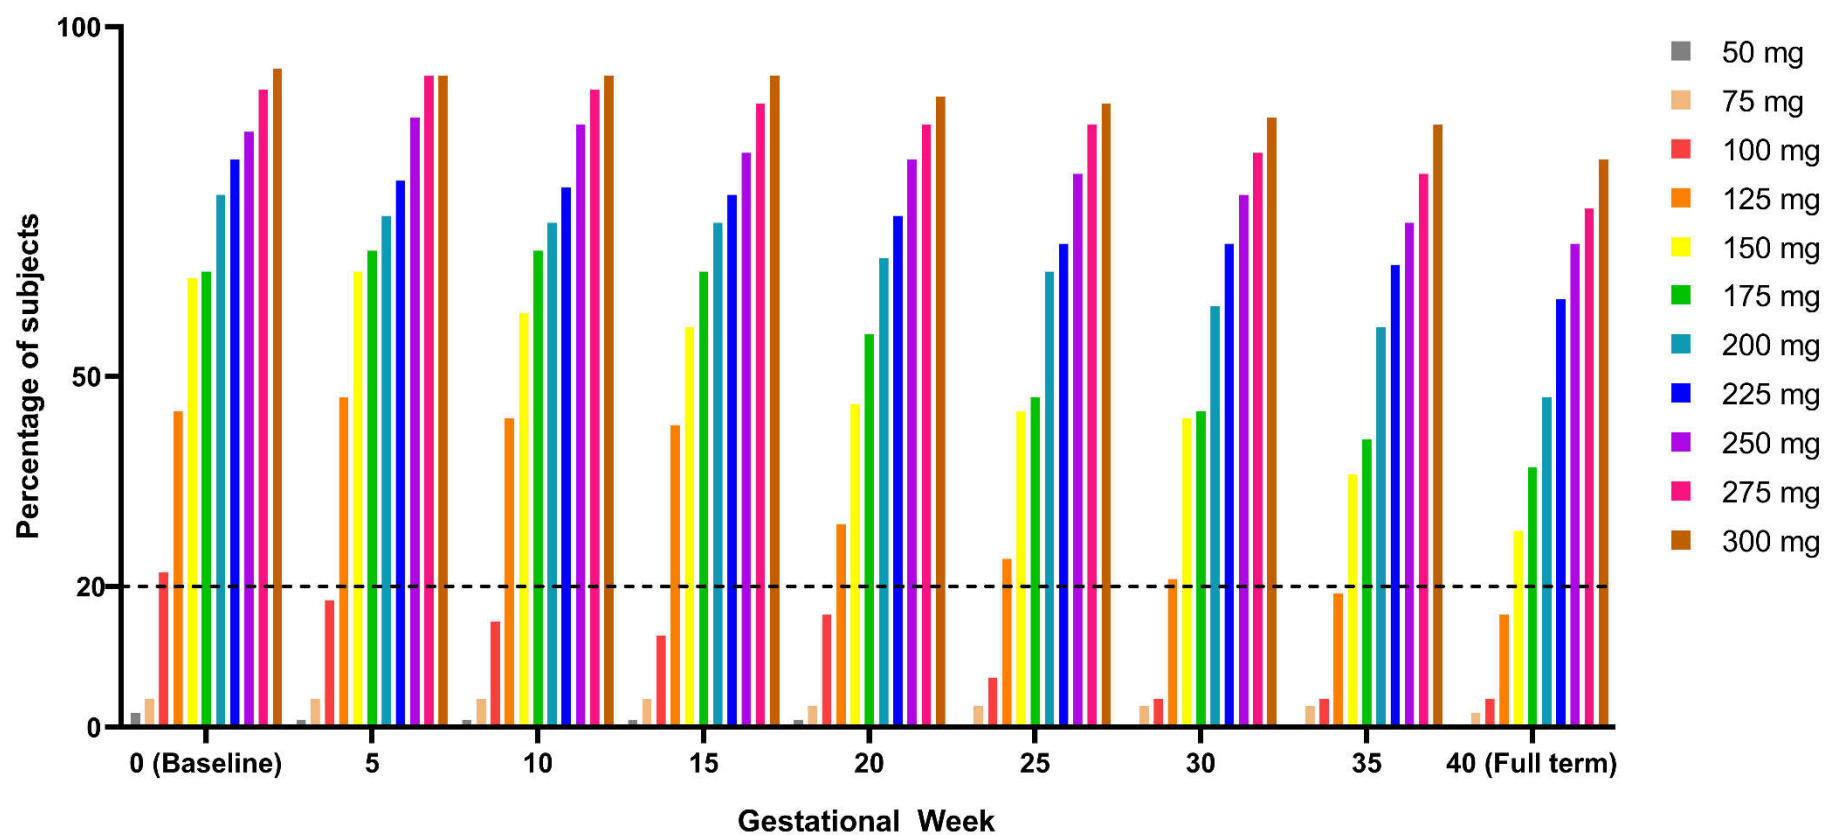

**Figure S7.** Percentage of PM population with peak concentration above 230 ng/mL. The dashed horizontal line represents the threshold of 20% of subjects.
